# Supplementary material for: Naked eye and optical biosensing of cysteine over the other amino acids using β-cyclodextrin decorated silver nanoparticles as a nanoprobe
Source: Royal Society of Chemistry journal article supplement (doi:10.1039/c7nj05164f), 2018-01-01
Supplement: c7nj05164f1.pdf [file c7nj05164f1.pdf]

## **Electronic supplementary information**

### **Naked eye and optical biosensing of cysteine over the other amino acids using $\beta$ -cyclodextrin decorated silver nanoparticles as a nanoprobe**

R. Rajamanikandan and M. Ilanchelian\*

Department of Chemistry,

Bharathiar University, Coimbatore - 641046, Tamil Nadu, India

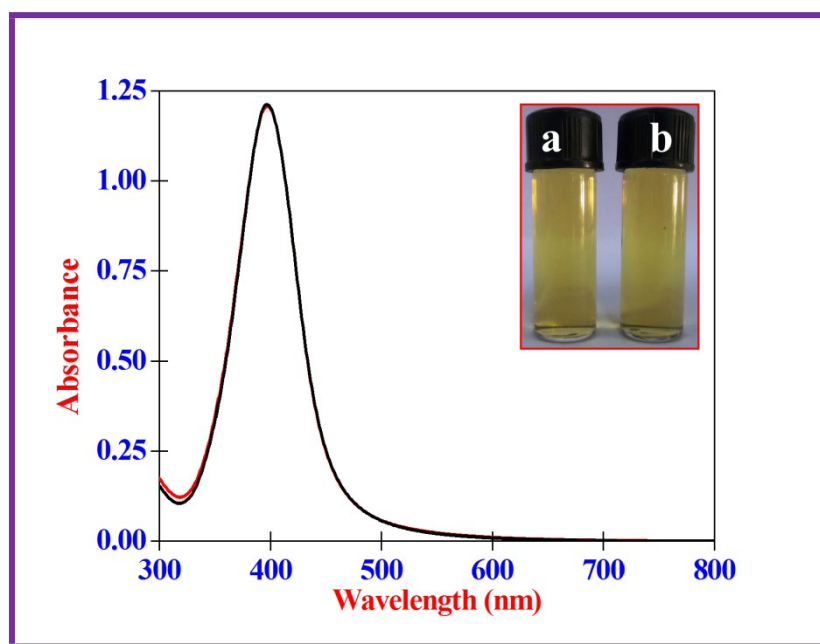

**Fig. S1.** Absorption spectra of freshly prepared and three months aged  $\beta$ -CD AgNPs. Inset shows photographic images of freshly prepared (a) and three months aged (b).

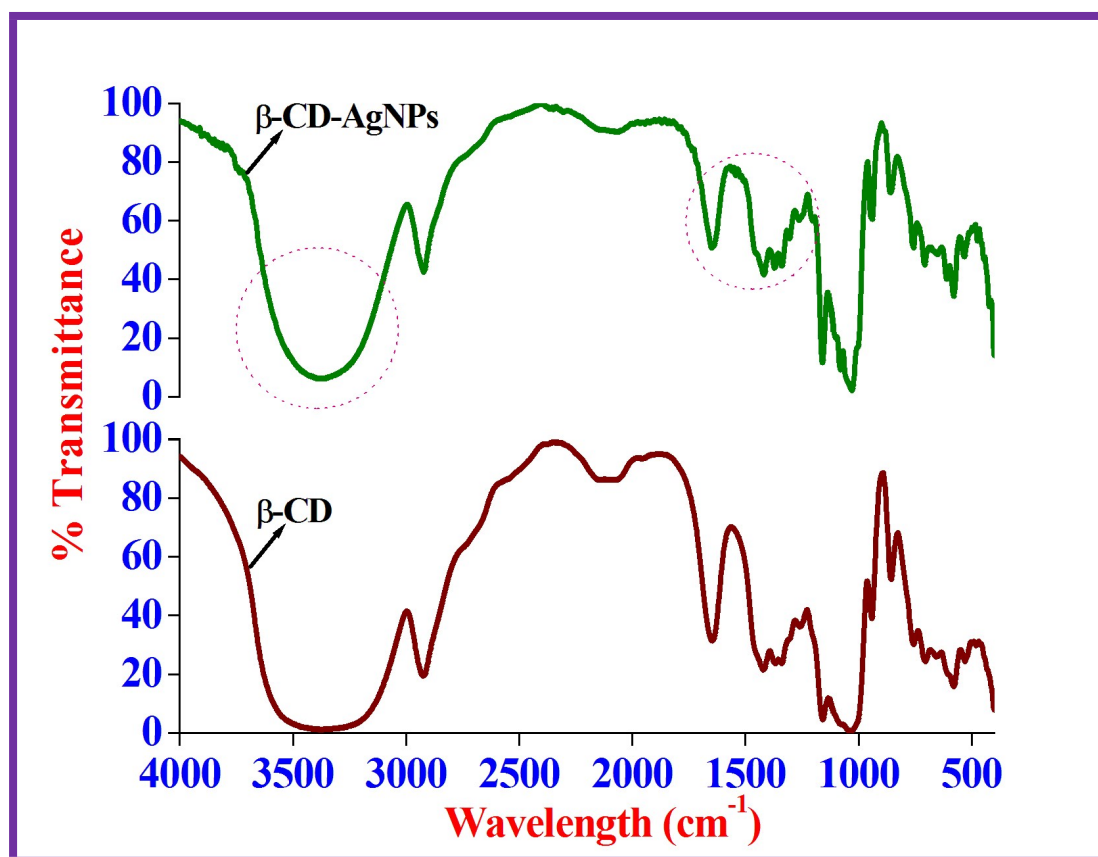

Fig. S2. FT-IR spectral results of  $\beta\text{-CD}$  alone and  $\beta\text{-CD}$  AgNPs

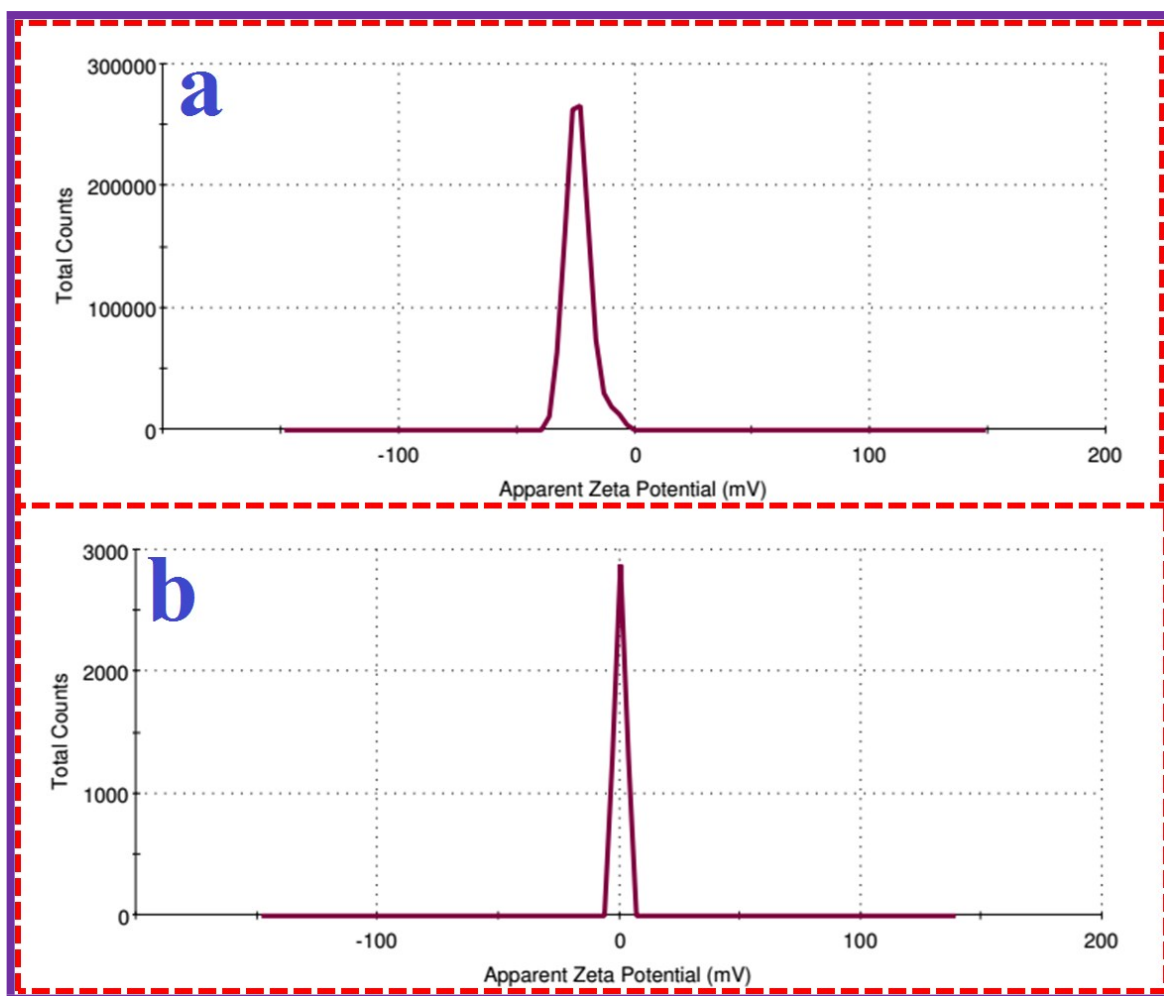

**Fig. S3.** Zeta potential data for  $\beta$ -CD AgNPs before (a) and after (b) the addition of  $30.00 \times 10^{-7}$  mol dm<sup>-3</sup> concentration of Cys

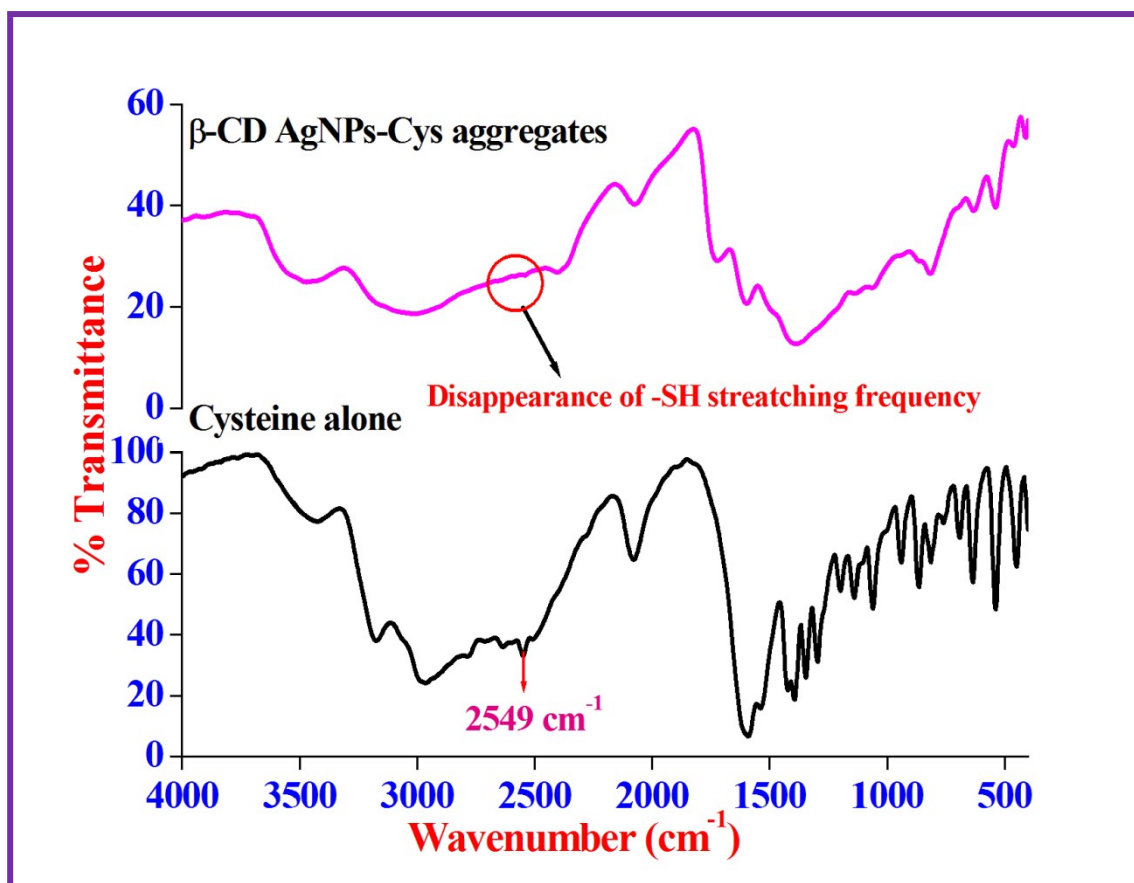

**Fig. S4.** FT-IR spectral results of Cys alone and Cys - $\beta$ -CD AgNPs aggregates

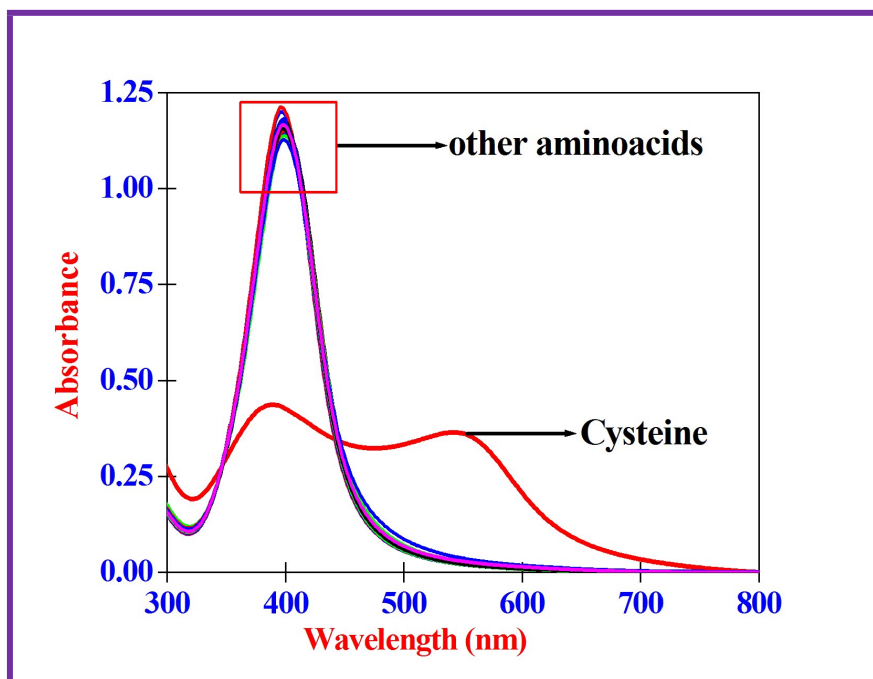

**Fig. S5.** Absorption spectral changes of  $\beta$ -CD AgNPs after the addition of 50-fold higher concentrations of essential amino acids

**Table S1.**

Comparison of present approach with some of the reported nanomaterials based sensors for Cys detection

| Method            | Nanoprobe                               | Linear range             | LOD          | Real samples                       | Interference from thiols | Ref       |
|-------------------|-----------------------------------------|--------------------------|--------------|------------------------------------|--------------------------|-----------|
| Electrochemistry  | GO–AuNCs                                | 0.05-20 $\mu$ M          | 20 nM        | Urine                              | ---                      | 11        |
| Electrochemistry  | Nanoporous gold                         | 1-400 $\mu$ M            | 50 nM        | ---                                | ---                      | 37        |
| Chemiluminescence | Ag NCs                                  | 5 nM-1 $\mu$ M           | 2.5 nM       | ---                                | ---                      | 38        |
| Fluorescence      | BSA-AgNCs                               | 2.0 - 90.0 $\mu$ M       | 0.81 $\mu$ M | Plasma samples                     | Yes                      | 39        |
| Fluorescence      | PMMA-AgNCs                              | 25 nM-6 $\mu$ M          | 20 nM        | ---                                | ---                      | 40        |
| Fluorescence      | CdTe/CdSe quantum dots                  | 0.2–100 $\mu$ M          | 131 nM       | Urine, Plasma, Cell extract sampls | Yes                      | 41        |
| Fluorescence      | PEI-AgNCs                               | 0.1– 10 $\mu$ M          | 42 nM        | Plasma                             | Yes                      | 42        |
| Colorimetry       | AuNPs                                   | 0.4-1 $\mu$ M            | 38.9 nM      | Serum                              | Yes                      | 19        |
| Colorimetry       | nonionic fluorosurfactant-capped Ag NPs | 1.5 - 6.0 $\mu$ M        | 50 nM        | Plasma and urine                   | ---                      | 30        |
| Colorimetry       | AgNPs                                   | 0.5-10 $\mu$ M           | 69 nM        | ---                                | ---                      | 31        |
| Colorimetry       | nonionic fluorosurfactant-capped AuNPs  | 0.5 - 4.5 $\mu$ M        | 0.4 $\mu$ M  | Plasma and urine                   | Yes                      | 43        |
| Colorimetry       | DNA-AuNPs                               | 50 nM - 10 $\mu$ M       | 100 nM       | ---                                | ---                      | 44        |
| Colorimetry       | $\beta$ –CD AgNPs                       | 0.3 $\mu$ M- 4.8 $\mu$ M | 4.65 nM      | Serum and Urine samples            | No                       | This work |

GO-Graphene oxide

BSA- Bovine Serum Albumin

PMMA- Poly(methacrylic acid)

PEI-Polyethyleneimine
